# Supplementary material
Source: publisher site journal article supplement (https://www.spandidos-publications.com/2909/downloadSupplementary)
Supplement: Supplementary file 1 [file downloadSupplementary]

Table SI. Clinical information of the lung adenocarcinoma and squamous cell carcinoma patients (N=48).

| Sample ID | Pathological type            | Sex    | Age (years) | TNM    | Clinical stage |
|-----------|------------------------------|--------|-------------|--------|----------------|
| 1         | Lung adenocarcinoma          | Female | 84          | T1N0M0 | II             |
| 2         | Lung adenocarcinoma          | Male   | 47          | T2N1M0 | II             |
| 3         | Lung adenocarcinoma          | Female | 72          | T1N0M0 | II             |
| 4         | Lung adenocarcinoma          | Female | 59          | T3N1M0 | II             |
| 5         | Lung adenocarcinoma          | Female | 66          | T2N0M0 | II             |
| 6         | Lung adenocarcinoma          | Male   | 60          | T2N0M0 | III            |
| 7         | Lung adenocarcinoma          | Male   | 49          | T1N0M0 | II             |
| 8         | Lung adenocarcinoma          | Male   | 66          | T3N0M0 | II             |
| 9         | Lung adenocarcinoma          | Female | 53          | T1N0M0 | II             |
| 10        | Lung adenocarcinoma          | Male   | 36          | T2N0M0 | II             |
| 11        | Lung adenocarcinoma          | Male   | 74          | T2N0M0 | II             |
| 12        | Lung adenocarcinoma          | Male   | 74          | T2N0M0 | II             |
| 13        | Lung adenocarcinoma          | Female | 20          | T1N0M0 | I              |
| 14        | Lung adenocarcinoma          | Male   | 58          | T2N0M0 | II             |
| 15        | Lung adenocarcinoma          | Male   | 30          | T1N0M0 | II             |
| 16        | Lung adenocarcinoma          | Male   | 67          | T2N0M0 | III            |
| 17        | Lung adenocarcinoma          | Male   | 57          | T2N0M0 | III            |
| 18        | Lung adenocarcinoma          | Female | 64          | T2N0M0 | II             |
| 19        | Lung adenocarcinoma          | Male   | 50          | T2N0M0 | III            |
| 20        | Lung adenocarcinoma          | Male   | 57          | T1N0M0 | II             |
| 21        | Lung adenocarcinoma          | Female | 55          | T1N0M0 | I              |
| 22        | Lung adenocarcinoma          | Female | 52          | T2N0M0 | III            |
| 23        | Lung adenocarcinoma          | Male   | 60          | T2N0M0 | II             |
| 24        | Lung adenocarcinoma          | Female | 58          | T2N0M0 | III            |
| 25        | Lung squamous cell carcinoma | Male   | 69          | T1N0M0 | II             |
| 26        | Lung squamous cell carcinoma | Male   | 69          | T1N0M0 | II             |
| 27        | Lung squamous cell carcinoma | Male   | 64          | T1N0M0 | III            |
| 28        | Lung squamous cell carcinoma | Male   | 57          | T1N0M0 | III            |
| 29        | Lung squamous cell carcinoma | Male   | 59          | T2N0M0 | II             |
| 30        | Lung squamous cell carcinoma | Female | 81          | T2N0M0 | III            |
| 31        | Lung squamous cell carcinoma | Female | 69          | T2N0M0 | III            |
| 32        | Lung squamous cell carcinoma | Female | 72          | T2N0M0 | II             |
| 33        | Lung squamous cell carcinoma | Male   | 80          | T2N0M0 | I              |
| 34        | Lung squamous cell carcinoma | Male   | 55          | T2N0M0 | II             |
| 35        | Lung squamous cell carcinoma | Male   | 52          | T2N0M0 | II             |
| 36        | Lung squamous cell carcinoma | Male   | 60          | T2N0M0 | II             |
| 37        | Lung squamous cell carcinoma | Male   | 73          | T2N0M0 | II             |
| 38        | Lung squamous cell carcinoma | Male   | 67          | T2N0M0 | II             |
| 39        | Lung squamous cell carcinoma | Male   | 65          | T2N0M0 | III            |

|    |                              |        |    |        |     |
|----|------------------------------|--------|----|--------|-----|
| 40 | Lung squamous cell carcinoma | Female | 65 | T2N1M0 | III |
| 41 | Lung squamous cell carcinoma | Male   | 56 | T2N1M0 | III |
| 42 | Lung squamous cell carcinoma | Male   | 56 | T2N1M0 | II  |
| 43 | Lung squamous cell carcinoma | Male   | 43 | T2N1M0 | II  |
| 44 | Lung squamous cell carcinoma | Male   | 59 | T2N1M0 | II  |
| 45 | Lung squamous cell carcinoma | Female | 65 | T2N1M0 | II  |
| 46 | Lung squamous cell carcinoma | Male   | 67 | T3N0M0 | III |
| 47 | Lung squamous cell carcinoma | Male   | 70 | T3N0M0 | II  |
| 48 | Lung squamous cell carcinoma | Male   | 57 | T3N0M0 | II  |

---
